# Supplementary material for: Optimization of Assembly Pipeline may Improve the Sequence of the Chloroplast Genome in Quercus spinosa
Source: PubMed Central journal article supplement (PMC5995970; doi:10.1038/s41598-018-27298-0), 2018-06-11
Supplement: 41598_2018_27298_MOESM1_ESM.pdf [file 41598_2018_27298_MOESM1_ESM.pdf]

## Supplementary Scripts and Tables to

### Optimization of Assembly Pipeline may Improve the Sequence of the Chloroplast Genome in *Quercus spinosa*

Xiangzhou Zhang<sup>1</sup>, Yong Hu<sup>1</sup>, Mei Liu<sup>1</sup> and Tiange Lang<sup>1,\*</sup>

#### Script S1 - S2

Script S1. FastqTrim\_Quality.pl: This program was used to remove the nucleotides which have Phred score lower than a specific value.

Script S2. fastqTrim\_Length.pl: This program was used to delete the fastq reads which have length less than a specific value as well as to erase the “orphanage” reads (single reads without pair).

#### Table S1 – S2

Table S1. The numbers of base pairs of the constructed *Quercus spinosa* cp genome with different assembled k-mers. The longest genome was constructed with k-value of k-mer 81.

Table S2. The assembly results of *Quercus spinosa* chloroplast genome contigs with the most optimal K-mer and the most optimal minimum read length.

## Script S1

.....

fastqTrim\_Quality.pl: This program was used to remove the nucleotides which have Phred score lower than a specific value.

.....

```
#!/usr/bin/env perl
```

```
use strict;
```

```
use warnings;
```

```
use Getopt::Long;
```

```
use File::Spec;
```

```
my $usage = "
```

```
$0 input_files [-p|probcutoff 0.05] [-h|phredcutoff 13] [-b|bwa] [-d|directory path] [-sanger
```

```
-solexa -illumina] [-454]\n
```

```
-p|probcutoff probability value (between 0 and 1) at which base-calling error is considered too high (default; p = 0.05) *or*
```

```
-h|phredcutoff Phred score (between 0 and 40) at which base-calling error is considered too high
```

```
-b|bwa use BWA trimming algorithm
```

```
-d|directory path to directory where output files are saved
```

```
-sanger Sanger format (bypasses automatic format detection)
```

```
-solexa Solexa format (bypasses automatic format detection)
```

```
-illumina Illumina format (bypasses automatic format detection)
```

```
-454 set flag if trimming Roche 454 data (experimental feature)
```

```
\n";
```

```
if( !$ARGV[0] ){ die "$usage"; }
```

```
my $prob_cutoff;
```

```
my $phrd_cutoff;
```

```
my $ascii_cutoff;
```

```
my $automatic_detection_lines = 10000;
```

```
my $sanger;
```

```
my $solexa;
```

```
my $illumina;
```

```
my $format;
```

```
my $user_defined;
```

```
my $bwa;
```

```
my $directory;
```

```
my $roche;
```

```
my $poor_quality_char = "B";
```

```
GetOptions(
```

```
    "p|probcutoff=f" => \$prob_cutoff,
```

```
    "h|phredcutoff=f" => \$phrd_cutoff,
```

```

    "b|bwa"          => \$bwa,
    "d|directory=s" => \$directory,
    "sanger"        => \$sanger,
    "solexa"        => \$solexa,
    "illumina"      => \$illumina,
    "454"           => \$roche
);
if( ($sanger && $solexa) || ($sanger && $illumina) || ($solexa && $illumina) ){
    die "error: please select only one of -sanger, -solexa or -illumina\n";
}
if( $sanger || $solexa || $illumina ){
    $user_defined = 1;
}
if( $sanger ){
    $format = "sanger";
}elseif( $solexa ){
    $format = "solexa";
}elseif( $illumina ){
    $format = "illumina";
}
if( $roche ){
    $format = "sanger";
}
my @files = @ARGV;
if( !$files[0] ){ die "$usage"; }
if( !defined( $prob_cutoff ) && !defined( $phrd_cutoff ) ){
    $prob_cutoff = 0.05;
    print STDOUT "Info: Using default quality cutoff of P = $prob_cutoff (change with -p or -h
flag)\n";
}elseif( defined( $prob_cutoff ) && defined( $phrd_cutoff ) ){
    die "Error: Please enter either a probability or a Phred quality cutoff value, not both";
}elseif( defined( $prob_cutoff ) && ( $prob_cutoff < 0 || $prob_cutoff > 1 ) ){
    die "Error: P quality cutoff must be between 0 and 1";
}elseif( defined( $phrd_cutoff ) && $phrd_cutoff < 0 ){
    die "Error: Phred quality cutoff must be greater than or equal to 0";
}
if( !`which R 2> err.log` ){
    print STDERR "Warning: Subsidiary program R not found. Histogram will not be
produced.\n";
}
`rm err.log`;
foreach my $input_file ( @files ){
    open( INPUT, "<$input_file" ) or die "Error: Failure opening $input_file for reading: $!\n";
    my @filepath = split( /\//, $input_file );

```

```

my $filename = $filepath[$#filepath];
if( !$user_defined ){
    $format = "";
}
if( !$format ){

    $format = &get_format(*INPUT, $automatic_detection_lines);
    if( !$format ){
        die "Error: File format cannot be determined\n";
    }
}
my %dict_q_to_Q;
%dict_q_to_Q=&q_to_Q();
if( $format eq "sanger" ){
    $poor_quality_char = "!";
}elsif( $format eq "solexa" ){
    $poor_quality_char = ";";
}elsif( $format eq "illumina" ){
    $poor_quality_char = "@";
}
if( $roche ){
    print STDOUT "User defined format: Roche 454, Sanger FASTQ format\n";
}elsif( $format eq "sanger" ){
    if( $user_defined ){
        print STDOUT "User defined format: Sanger FASTQ format\n";
    }else{
        print STDOUT "Automatic format detection: Sanger FASTQ format\n";
    }
}elsif( $format eq "solexa" ){
    if( $user_defined ){
        print STDOUT "User defined format: Solexa FASTQ format, Illumina pipeline 1.2 or
less\n";
    }else{
        print STDOUT "Automatic format detection: Solexa FASTQ format, Illumina
pipeline 1.2 or less\n";
    }
}elsif( $format eq "illumina" ){
    if( $user_defined ){
        print STDOUT "User defined format: Illumina FASTQ format, Illumina pipeline
1.3+\n";
    }else{
        print STDOUT "Automatic format detection: Illumina FASTQ format, Illumina
pipeline 1.3+\n";
    }
}

```

```

}
if( defined( $phrd_cutoff ) ){
    $ascii_cutoff = &Q_to_q( $phrd_cutoff );
    $prob_cutoff = sprintf("%.5f", &Q_to_p( $phrd_cutoff ));
}else{
    $ascii_cutoff = &Q_to_q( &p_to_Q( $prob_cutoff ) );
}
my $threshold = 0;
if( $bwa ){

    if( defined( $phrd_cutoff ) ){
        $threshold = $phrd_cutoff;
    }else{
        $threshold = &p_to_Q( $prob_cutoff );
    }
}
my $output_file;
if ( $directory ){
    # remove any trailing '/'
    $directory =~ s/\^z//;
    my $file_name = $filename . ".trimmed";
    $output_file = File::Spec->catpath( undef, $directory, $file_name );
}else{
    $output_file = $filename . ".trimmed";
}

if( -e $output_file ){
    die "Error: Output file $output_file already exists: $!\n";
}
open( OUTPUT, ">$output_file" )
    or die "Error: Failure opening $output_file for writing: $!\n";
my @segment_hist;
my %hash=();
my $segment_sum = 0;
my $segment_count = 0;
my $original_length;
my $seq_count = 0;
while( <INPUT> ){
    my $ID1 = $_;
    if( substr( $ID1, 0, 1) ne "@" ){
        die "Error: Input file not in correct FASTQ format at seq ID $ID1\n";
    }
    chomp( my $seq_string = <INPUT> );
    my $ID2 = <INPUT>;

```



```

    }
    if( !$cutoff_hit ){
        $best_length = $original_length;
    }
}
if( !defined($segment_hist[ $best_length ] ) ){
    $segment_hist[ $best_length ] = 0;
}
$segment_hist[ $best_length ]++;
$segment_sum += $best_length;
$segment_count++;
if (exists $hash{$best_length}) {
    $hash{$best_length}+=1;
}
else{
    $hash{$best_length}=1
}
if( $bwa ){
    if( $best_length <= 1 && $bad_first ) {
        $seq_string = "N";
        $quality_string = $poor_quality_char;
    }else{
        $seq_string = substr($seq_string, 0, $best_length);
        $quality_string = substr($quality_string, 0, $best_length);
    }
}else{
    if ($best_length <= 0) {
        $seq_string = "N";
        $quality_string = $poor_quality_char;
    } else {
        $seq_string = substr($seq_string, $best_start_index, $best_length);
        $quality_string = substr($quality_string, $best_start_index, $best_length);
    }
}
print OUTPUT $ID1, $seq_string, "\n", $ID2, $quality_string, "\n";
}
my $segment_mean = sprintf( "%.1f", $segment_sum / $segment_count );
my $halfway_index = $segment_count / 2;
my $current_sum = 0;
my $current_index = 0;
my $median_index1;
my $median_index2;
while( !defined( $median_index1 ) || !defined( $median_index2 ) ){

```

```

if( defined( $segment_hist[ $current_index ] ) ){

    $current_sum += $segment_hist[ $current_index ];
}
if( $current_sum > $halfway_index ){
    if( !defined( $median_index1 ) ){
        $median_index1 = $current_index;
    }
    if( !defined( $median_index2 ) ){
        $median_index2 = $current_index;
    }
}
elseif( $current_sum == $halfway_index    && !defined( $median_index1 ) ){
    $median_index1 = $current_index;
}
}
$current_index++;
}
$current_index--;
my $segment_median;
if( $segment_count % 2 == 1){
    $segment_median = $median_index1;
}else{
    $segment_median = sprintf( "%.0f", ( ( $median_index1 + $median_index2 ) / 2 ) );
}
print STDOUT "Info: $output_file: mean segment length = $segment_mean, median
segment length = $segment_median\n";
close INPUT or die "Error: Cannot close $input_file: $!";
close OUTPUT or die "Error: Cannot close $output_file; $!";
my $segments_filename;
if ( $directory ){
    $segments_filename="$directory/$filename.trimmed_segments";
    }
else{
    $segments_filename="$filename.trimmed_segments";
    }
open(SEGMENTS, ">$segments_filename");
print SEGMENTS "Read_length\tProportion_of_reads\n";
my $i;
for ($i=0;$i <= $original_length; $i++){
    if (exists $hash{$i}){
        my $percentage=$hash{$i}/$segment_count;
        print SEGMENTS "$i\t$percentage\n";    }
    else{print SEGMENTS "$i\t0\n";
        }
    }
}
}

```



```
close SEGMENTS or die "Error: Cannot close $segments_filename; $!";  
}
```

## Script S2

.....

fastqTrim\_Length.pl: This program was used to delete the fastq reads which have length less than a specific value as well as to erase the “orphanage” reads (single reads without pair).

.....

```
#!/usr/bin/env perl
```

```
use strict;
```

```
use warnings;
```

```
use Getopt::Long;
```

```
use File::Spec;
```

```
my $length = 25;
```

```
my $paired = 0;
```

```
my $directory;
```

```
my $usage = "
```

```
$0 one single-end or two paired-end FASTQ files [-l|length 25] [-d|directory path]\n
```

```
-l|length          length cutoff [defaults to 25 nucleotides]
```

```
-d|directory      path to directory where output files are saved
```

```
\n";
```

```
GetOptions(
```

```
    "l|length=i"      => \$length,
```

```
    "d|directory=s"  => \$directory
```

```
);
```

```
my @files = @ARGV;
```

```
if( !$files[0] || length(@files) > 2 ){
```

```
    die $usage;
```

```
}
```

```
if( scalar(@files) == 2 ){
```

```
    $paired = 1;
```

```
}
```

```
unless( -e $files[0] ){
```

```
    die "error: file $files[0] does not exist\n";
```

```
}
```

```
open( FIRST, "<$files[0]" )
```

```
    or die "error: failure opening $files[0] for reading: $!\n";
```

```
if( $paired ){
```

```
    unless( -e $files[1] ){
```

```
        die "error: file $files[1] does not exist\n";
```

```
    }
```

```
    open( SECOND, "<$files[1]" )
```

```
        or die "error: failure opening $files[1] for reading: $!\n";
```

```
}
```

```

my $first_line;
my $second_line;
$first_line = <FIRST>;
if( substr($first_line, 0, 1) ne "@" ){
    die "error: $files[0] does not appear to be in FASTQ format\n";
}
if( $paired ){
    $second_line = <SECOND>;
    if( substr($second_line, 0, 1) ne "@" ){
        die "error: $files[1] does not appear to be in FASTQ format\n";
    }
}
my $first_id;
my $second_id;
if( $paired ){
    if( $first_line !~ /\S+\s\S+/ ){
        if( $first_line =~ /\S*\S*/ ){
            $first_id = $1;
        }else{
            $first_id = $first_line;
        }
    }elseif( $first_line =~ /\S+\s\S+/ ){
        my @first_line_elements = split( /\s+/, $first_line );
        pop @first_line_elements;
        $first_id = join( " ", @first_line_elements );
    }else{
        $first_id = $first_line;
    }
    if( $second_line !~ /\S+\s\S+/ ){
        if( $second_line =~ /\S*\S*/ ){
            $second_id = $1;
        }else{
            $second_id = $second_line;
        }
    }elseif( $second_line =~ /\S+\s\S+/ ){
        my @second_line_elements = split( /\s+/, $second_line );
        pop @second_line_elements;
        $second_id = join( " ", @second_line_elements );
    }else{
        $second_id = $second_line;
    }
    if( $first_id ne $second_id ){
        die "error: files $files[0] and $files[1] do not seem to be paired\n";
    }
}

```

```

}
if( $paired ){
    my $first_line_counter = 0;
    my $second_line_counter = 0;
    $first_line_counter++ while <FIRST>;
    $second_line_counter++ while <SECOND>;
    if( $first_line_counter != $second_line_counter ){
        die "error: files $files[0] and $files[1] appear to be different lengths\n";
    }
}
seek(FIRST, 0, 0);
if( $paired ){
    seek(SECOND, 0, 0);
}
my $single_file;
if ( $directory ){
    $directory =~ s/\//;
    my @file_ending_elements = split(/\//, $files[0]);
    my $item = scalar @file_ending_elements - 1;
    my $file_name = $file_ending_elements[$item] . ".single";
    $single_file = File::Spec->catpath( undef, $directory, $file_name );
}else{
    $single_file = $files[0] . ".single";
}
if( -e $single_file ){
    die "error: file $single_file already exists\n";
}
open( SINGLE, ">$single_file" )
    or die "error: failure opening $single_file for writing: $!\n";
my $discard_file;
if ( $directory ){
    $directory =~ s/\//;
    my @file_ending_elements = split(/\//, $files[0]);
    my $item = scalar @file_ending_elements - 1;
    my $file_name = $file_ending_elements[$item] . ".discard";
    $discard_file = File::Spec->catpath( undef, $directory, $file_name );
}else{
    $discard_file = $files[0] . ".discard";
}
if( -e $discard_file ){
    die "error: file $discard_file already exists\n";
}
open( DISCARD, ">$discard_file" )
    or die "error: failure opening $discard_file for writing: $!\n";

```

```

my $paired_file1;
my $paired_file2;
if( $paired ){
    if ( $directory ){
        $directory =~ s/\^z//;
        my @file_ending_elements = split(/\//, $files[0]);
        my $item = scalar @file_ending_elements - 1;
        my $file_name = $file_ending_elements[$item] . ".paired1";
        $paired_file1 = File::Spec->catpath( undef, $directory, $file_name );
    }else{
        $paired_file1 = $files[0] . ".paired1";
    }
    if( -e $paired_file1 ){
        die "error: file $paired_file1 already exists\n";
    }
    open( PAIRED1, ">$paired_file1" )
        or die "error: failure opening $paired_file1 for writing: $!\n";
    if ( $directory ){
        $directory =~ s/\^z//;
        my @file_ending_elements = split(/\//, $files[0]);
        my $item = scalar @file_ending_elements - 1;
        my $file_name = $file_ending_elements[$item] . ".paired2";
        $paired_file2 = File::Spec->catpath( undef, $directory, $file_name );
    }else{
        $paired_file2 = $files[0] . ".paired2";
    }
    if( -e $paired_file2 ){
        die "error: file $paired_file2 already exists\n";
    }
    open( PAIRED2, ">$paired_file2" )
        or die "error: failure opening $paired_file2 for writing: $!\n";
}
my $count_p1=0;
my $count_p2=0;
my $count_d=0;
my $count_s=0;
until( eof(FIRST) ){
    chomp( my $first_header_line1 = <FIRST> );
    chomp( my $first_sequence_line = <FIRST> );
    chomp( my $first_header_line2 = <FIRST> );
    chomp( my $first_quality_line = <FIRST> );
    my $second_header_line1;
    my $second_sequence_line;
    my $second_header_line2;

```

```

my $second_quality_line;
if( $paired ){
    chomp( $second_header_line1 = <SECOND> );
    chomp( $second_sequence_line = <SECOND> );
    chomp( $second_header_line2 = <SECOND> );
    chomp( $second_quality_line = <SECOND> );
}
if( $paired ){
    my $first_header_id;
    my $second_header_id;
    if( $first_header_line1 !~ /\S+\s\S+/ ){
        if( $first_header_line1 =~ /(\S*)\s\S*/ ){
            $first_header_id = $1;
        }else{
            $first_header_id = $first_header_line1;
        }
    }elseif( $first_header_line1 =~ /\S+\s\S+/ ){
        my @first_header_line_elements = split( /\s+/, $first_header_line1 );
        pop @first_header_line_elements;
        $first_header_id = join( " ", @first_header_line_elements );
    }else{
        $first_header_id = $first_header_line1;
    }
}

# second of pair
if( $second_header_line1 !~ /\S+\s\S+/ ){
    if( $second_header_line1 =~ /(\S*)\s\S*/ ){
        $second_header_id = $1;
    }else{
        $second_header_id = $second_header_line1;
    }
}elseif( $second_header_line1 =~ /\S+\s\S+/ ){
    my @second_header_line_elements = split( /\s+/, $second_header_line1 );
    pop @second_header_line_elements;
    $second_header_id = join( " ", @second_header_line_elements );
}else{
    $second_header_id = $second_header_line1;
}
if( $first_header_id ne $second_header_id ){
    die "error: header lines in $files[0] and $files[1] do not seem to be paired\n";
}
}
if( $paired ){

```

```

        if( length($first_sequence_line) >= $length && length($second_sequence_line) >=
$length ){
            print PAIRED1 $first_header_line1, "\n", $first_sequence_line, "\n",
$first_header_line2, "\n", $first_quality_line, "\n";
            $count_p1+=1;
            print PAIRED2 $second_header_line1, "\n", $second_sequence_line, "\n",
$second_header_line2, "\n", $second_quality_line, "\n";
            $count_p2+=1;
        }
        elsif( length($first_sequence_line) < $length && length($second_sequence_line) <
$length ){
            print DISCARD $first_header_line1, "\n", $first_sequence_line, "\n",
$first_header_line2, "\n", $first_quality_line, "\n";
            $count_d+=1;
            print DISCARD $second_header_line1, "\n", $second_sequence_line, "\n",
$second_header_line2, "\n", $second_quality_line, "\n";
            $count_d+=1;
        }
        elsif( length($first_sequence_line) < $length && length($second_sequence_line) >=
$length ){
            print DISCARD $first_header_line1, "\n", $first_sequence_line, "\n",
$first_header_line2, "\n", $first_quality_line, "\n";
            $count_d+=1;
            print SINGLE $second_header_line1, "\n", $second_sequence_line, "\n",
$second_header_line2, "\n", $second_quality_line, "\n";
            $count_s+=1;
        }
        elsif( length($first_sequence_line) >= $length && length($second_sequence_line) <
$length ){
            print SINGLE $first_header_line1, "\n", $first_sequence_line, "\n",
$first_header_line2, "\n", $first_quality_line, "\n";
            $count_s+=1;
            print DISCARD $second_header_line1, "\n", $second_sequence_line, "\n",
$second_header_line2, "\n", $second_quality_line, "\n";
            $count_d+=1;
        }
    }
    else{
        if( length($first_sequence_line) >= $length ){
            print SINGLE $first_header_line1, "\n", $first_sequence_line, "\n",
$first_header_line2, "\n", $first_quality_line, "\n";
            $count_s+=1;
        }else{
            print DISCARD $first_header_line1, "\n", $first_sequence_line, "\n",

```

```

$first_header_line2, "\n", $first_quality_line, "\n";
    $count_d+=1;
    }
}
}
my @name = split(/\./, $single_file);
my $summaryname= join '.', @name[0..$#name-1];
my $outputname = $summaryname.".summary.txt";
open(FILEOUT, ">$outputname");
if( $paired ){
print FILEOUT "paired1\t$count_p1\n", "paired2\t$count_p2\n", "single\t$count_s\n",
"discard\t$count_d\n";}
else{
print FILEOUT "single\t$count_s\n", "discard\t$count_d\n";}
close FILEOUT;
close FIRST or die "error: failure closing $files[0]: $!\n";
if( $paired ){
    close SECOND or die "error: failure closing $files[1]: $!\n";
}
close SINGLE or die "error: failure closing $single_file: $!\n";
close DISCARD or die "error: failure closing $discard_file: $!\n";
if( $paired ){
    close PAIRED1 or die "error: failure closing $paired_file1: $!\n";
    close PAIRED2 or die "error: failure closing $paired_file2: $!\n";
}
exit 0 or die "error: $0 ended abnormally: $!\n";

```



**Table S1**

|        |        |        |        |        |        |        |        |        |        |        |        |        |        |
|--------|--------|--------|--------|--------|--------|--------|--------|--------|--------|--------|--------|--------|--------|
| K17    | K19    | K21    | K23    | K25    | K27    | K29    | K31    | K33    | K35    | K37    | K39    | K41    | K43    |
| 23825  | 53912  | 69572  | 79045  | 85509  | 93356  | 98891  | 103680 | 109728 | 113506 | 119195 | 122100 | 122904 | 124573 |
| K45    | K47    | K49    | K51    | K53    | K55    | K57    | K59    | K61    | K63    | K65    | K67    | K69    | K71    |
| 127947 | 130691 | 132755 | 134728 | 136704 | 137585 | 138763 | 139603 | 140464 | 141555 | 142021 | 143541 | 144530 | 145309 |
| K73    | K75    | K77    | K79    | K81    | K83    | K85    | K87    | K89    | K91    | K93    | K95    | K97    | K99    |
| 146636 | 148466 | 148758 | 149472 | 149703 | 149042 | 148051 | 146459 | 144175 | 138962 | 130525 | 119665 | 97355  | 55904  |

Supplementary Table 1. The numbers of base pairs of the constructed *Quercus spinosa* cp genome with different assembled k-mers. The longest genome was constructed with k-value of k-mer 81.

**Table S2**

| Total number of reads | Total length of reads (base pair) | Number of contigs | N50 of contigs (base pair) | Minimum contig length (base pair) | Maximum contig length (base pair) |
|-----------------------|-----------------------------------|-------------------|----------------------------|-----------------------------------|-----------------------------------|
| 2,781,415             | 561,845,830                       | 2,121             | 811                        | 150                               | 7,173                             |

Supplementary Table 2. The assembly results of *Quercus spinosa* chloroplast genome contigs with the most optimal K-mer and the most optimal minimum read length.
